# Supplementary material for: Transcriptome and proteomic analyses reveal multiple differences associated with chloroplast development in the spaceflight-induced wheat albino mutant mta
Source: PubMed Central journal article supplement (PMC5443577; doi:10.1371/journal.pone.0177992), 2017-05-24

S2 Fig

**A**

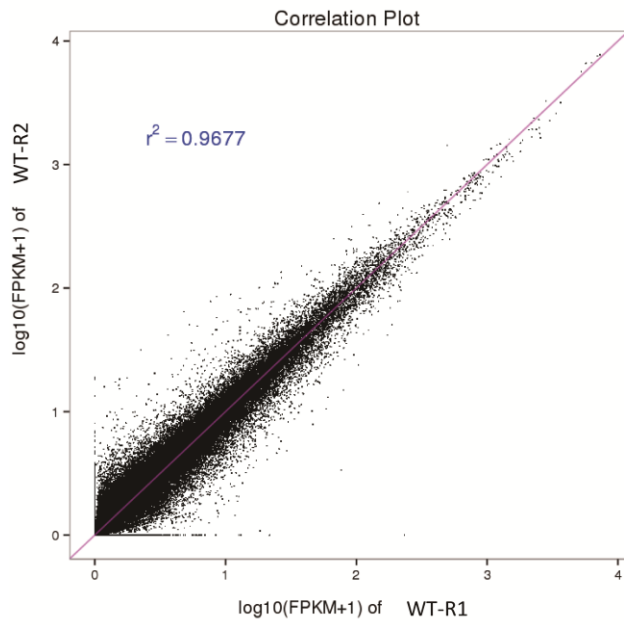

**B**

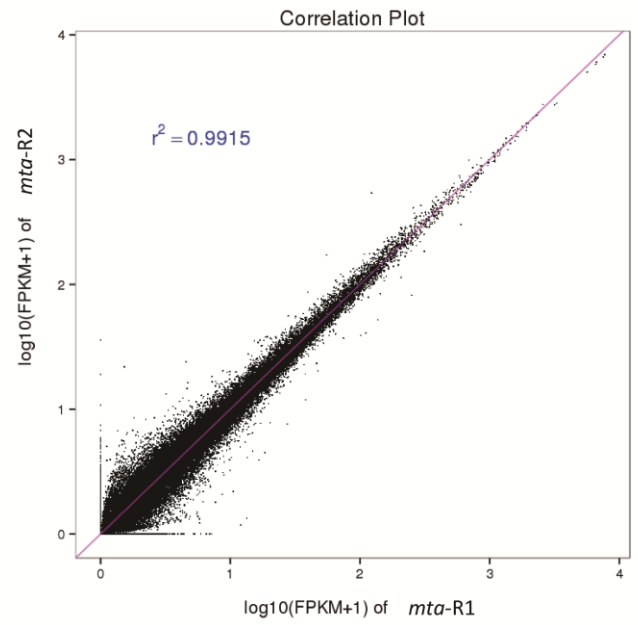

Supplement: pone.0177992.s002.pdf [file pone.0177992.s002.pdf]
